# Supplementary material for: Novel prognostic significance of the pectoralis muscle index in newly diagnosed multiple myeloma: A retrospective cohort study
Source: Research Square preprint supplement (doi:10.21203/rs.3.rs-7871991/v1), 2025-11-28
Supplement: Supplementary file 1 [file a8461289b7aa629d8be1b237.xlsx]

## Sheet: Table S1
Supplemental Table 1. Treatment response according to pectoralis muscle index and induction regimen
Regimen	Response	Total	Higher PMI (n=86)	Lower PMI (n=29)	p
Total (n=115)	CR	16 (14%)	13 (15%)	3 (10%)	0.82
	VGPR	36 (31%)	27 (31%)	9 (31%)
	PR	34 (30%)	26 (30%)	8 (28%)
	SD/PD/NE	29 (25%)	20 (23%)	9 (31%)
VMP (n=87)	CR	12 (14%)	9 (15%)	3 (12%)	0.93
	VGPR	23 (26%)	15 (25%)	8 (31%)
	PR	24 (28%)	17 (28%)	7 (27%)
	SD/PD/NE	28 (32%)	20 (33%)	8 (31%)
VTD (n=28)	CR	4 (14%)	4 (16%)	0	0.03
	VGPR	13 (46%)	12 (48%)	1 (33%)
	PR	10 (36%)	9 (36%)	1 (33%)
	SD/PD/NE	1 (4%)	0	1 (33%)
Abbreviations: PMI, pectoralis muscle index; VMP, bortezomib, melphalan, and prednisone; VTD, bortezomib, thalidomide, and dexamethasone; CR, complete response; VGPR, very good partial response; PR, partial response; SD, stable disease; PD, progressive disease; NE, not evaluable

## Sheet: Table S2
Supplemental Table 2. Cox regression for overall survival
A. Total
Factor	Level	Hazard ratio	95% LCI	95% UCI	p	Hazard ratio	95% LCI	95% UCI	p
Age	continuous (per year)	1.03891	1.00012	1.0792	0.049	1.00487	0.94973	1.06322	0.866
Sex	female vs. male	0.848311	0.45615	1.57762	0.603
Heavy chain type	other vs. IgG	1.0138	0.543243	1.89197	0.966
Light chain type	lambda vs. kappa	1.77789	0.966258	3.27129	0.064
R-ISS	III vs. I-II	2.15082	1.08343	4.26978	0.029	1.68533	0.792315	3.58486	0.175
Cytogenetic risk	high vs. standard	3.45561	1.80806	6.60443	0	3.03643	1.49676	6.15991	0.002
Hypercalcemia	yes vs. no	1.3533	0.656701	2.78882	0.412
Renal insufficiency	yes vs. no	1.59926	0.817935	3.12694	0.17
Anemia	yes vs. no	1.31896	0.603698	2.88166	0.488
Bone disease	yes vs. no	0.692591	0.288334	1.66364	0.411
Induction regimen	VMP vs. VTD	3.05815	1.2774	7.3213	0.012	2.38101	0.743138	7.62872	0.144
Body mass index	continuous (kg/m2)	1.00711	0.916025	1.10725	0.884
Pectoralis muscle index	lower vs. higher	3.22335	1.67485	6.20351	0	1.72461	0.82019	3.62635	0.151
B. Standard-risk cytogenetics
Factor	Level	Hazard ratio	95% LCI	95% UCI	p	Hazard ratio	95% LCI	95% UCI	p
Age	continuous (per year)	1.01908	0.960895	1.08078	0.529
Sex	female vs. male	0.863511	0.318423	2.3417	0.773
Heavy chain type	other vs. IgG	0.716044	0.230587	2.22354	0.563
Light chain type	lambda vs. kappa	3.983	1.27692	12.4239	0.017	3.43315	1.08134	10.8999	0.036
R-ISS	III vs. I-II	0.808996	0.177795	3.68106	0.784
Hypercalcemia	yes vs. no	1.0473	0.292589	3.74874	0.943
Renal insufficiency	yes vs. no	0.711702	0.251523	2.01381	0.522
Anemia	yes vs. no	0.95953	0.325053	2.83245	0.94
Bone disease	yes vs. no	0.675974	0.186638	2.44827	0.551
Induction regimen	VMP vs. VTD	2.89791	0.808265	10.39	0.102
Body mass index	continuous (kg/m2)	1.11102	0.944428	1.307	0.204
Pectoralis muscle index	lower vs. higher	5.29798	1.69481	16.5614	0.004	4.15726	1.3292	13.0024	0.014
C. High-risk cytogenetics
Factor	Level	Hazard ratio	95% LCI	95% UCI	p	Hazard ratio	95% LCI	95% UCI	p
Age	continuous (per year)	1.07156	0.999923	1.14833	0.05
Sex	female vs. male	0.635084	0.266834	1.51155	0.305
Heavy chain type	other vs. IgG	1.01154	0.445293	2.29783	0.978
Light chain type	lambda vs. kappa	1.3655	0.590155	3.15947	0.467
R-ISS	III vs. I-II	2.51156	1.02846	6.13337	0.043	2.77568	0.968034	7.95881	0.057
Hypercalcemia	yes vs. no	1.42997	0.522	3.91727	0.487
Renal insufficiency	yes vs. no	3.54715	1.28276	9.80874	0.015	4.15781	1.43592	12.0392	0.009
Anemia	yes vs. no	1.17165	0.272155	5.04406	0.832
Bone disease	yes vs. no	0.373728	0.104307	1.33905	0.131
Induction regimen	VMP vs. VTD	2.62553	0.775754	8.88604	0.121
Body mass index	continuous (kg/m2)	0.967869	0.860196	1.08902	0.587
Pectoralis muscle index	lower vs. higher	1.97419	0.838106	4.65026	0.12	1.36996	0.52933	3.54561	0.516
Abbreviations: R-ISS, Revised International Staging System; VMP, bortezomib, melphalan, and prednisone
